# Supplementary material for: An efficient ICT based fluorescent turn-on dyad for selective detection of fluoride and carbon dioxide
Source: Royal Society of Chemistry journal article supplement (doi:10.1039/c5nj01920f), 2015-10-19
Supplement: c5nj01920f1.pdf [file c5nj01920f1.pdf]

## SUPPLEMENTARY INFORMATION

### **An Efficient ICT based Fluorescence Turn-On Dyad for Selective Detection of Fluoride and Carbon dioxide**

Rashid Ali, Syed S. Razi, Ramesh C. Gupta, Sushil K. Dwivedi and Arvind Misra\*

Department of Chemistry, Faculty of Science, Banaras Hindu University, Varanasi – 221 005 UP  
INDIA

Corresponding author: [arvindmisra2003@yahoo.com](mailto:arvindmisra2003@yahoo.com); [amisra@bhu.ac.in](mailto:amisra@bhu.ac.in)  
Tel: +91-542-6702503; Fax: +91-0542-2368127, 2368175.

#### **Contents**

#### **Experimental**

**Figure S1:**  $^1\text{H}$  NMR spectrum of **1a** in  $\text{DMSO-}d_6$ .

**Figure S2:** FT-IR spectrum of **1b**.

**Figure S3:**  $^1\text{H}$  NMR spectrum of **1** in  $\text{DMSO-}d_6$ .

**Figure S4:** FT-IR spectrum of **1**.

**Figure S5:**  $^1\text{H}$  NMR spectrum of **2** in  $\text{DMSO-}d_6$ .

**Figure S6:**  $^{13}\text{C}$  NMR spectrum of **2** in  $\text{DMSO-}d_6$ .

**Figure S7:** FT-IR spectrum of **2**.

**Figure S8:** ESI-MS spectrum of **2**.

**Figure S9:** Normalized (a) Absorption and (b) Emission spectra of probe **2** in different solvents.

**Figure S10:** Fluorescence spectra of **2** in DMSO-Water mixtures with different water contents. Inset: the dependence of the fluorescence intensity on the composition of water and the corresponding fluorescence images of **2**.

**Figure S11:** (a) Change in absorption as a function of  $\text{F}^-$  and (b) Job's plot and Benesi-Hildebrand plots based on absorption spectra.

**Figure S12:** (a) Calibration curve for **2** (b) Calibration sensitivity curve (m) for **2** with  $\text{F}^-$ .  $\Delta I$  show the change in emission intensity of **2** upon addition of  $\text{F}^-$ .

**Figure S13:** (a) Change in absorption ( $5\mu\text{M}$ ) and (b) emission ( $1\mu\text{M}$ ,  $\lambda_{\text{ex}}=368\text{ nm}$ ) spectra of **2** at different pHs in HEPES buffer.

**Figure S14:**  $^1\text{H}$  NMR spectrum of **2** upon addition of 1.0 equiv of  $\text{F}^-$  in  $\text{DMSO-}d_6$ .

**Figure S15:**  $^1\text{H}$  NMR spectrum of **2** upon addition of 2.0 equiv of  $\text{F}^-$  in  $\text{DMSO-}d_6$ .

**Figure S16:**  $^1\text{H}$  NMR spectrum of **2** upon addition of 3.0 equiv of  $\text{F}^-$  in  $\text{DMSO-}d_6$ .

**Figure S17:**  $^1\text{H}$  NMR spectrum of **2** upon addition of 5.0 equiv of  $\text{F}^-$  in  $\text{DMSO-}d_6$ .

**Figure S18:** Fluorescence intensity change of **2**+ $\text{F}^-$  system (1  $\mu\text{M}$ ,  $\lambda_{\text{ex}} = 370$  nm) upon bubbling with different concentration of  $\text{CO}_2$  gas.

**Figure S19:** Change in emission spectra of **2** (1  $\mu\text{M}$ ) at (a)  $\lambda_{\text{ex}} = 370$  nm (b)  $\lambda_{\text{ex}} = 405$  nm, upon bubbling of 25 mL of different gases ( $\text{H}_2\text{S}$ ,  $\text{SO}_2$ ,  $\text{HCl}$  and  $\text{CO}_2$ ) to the solution of **2**+  $\text{F}^-$  in  $\text{H}_2\text{O-DMSO}$  (20%).

**Figure S20:**  $^1\text{H}$  NMR spectrum of **3** in  $\text{DMSO-}d_6$ .

**Figure S21:**  $^{13}\text{C}$  NMR spectrum of **3** in  $\text{DMSO-}d_6$ .

**Figure S22:** FT-IR spectrum of **3**.

**Figure S23:** Mass spectrum of **3**.

## General

**Materials and Chemicals.** All the reagents and solvents were purchased from Sigma-Aldrich Chemical Co. Pvt. Ltd. stored in a desiccator under vacuum containing self indicating silica, and used without any further purification. Solvents were purified prior to use. UV-vis absorption spectra were recorded on a Perkin Elmer Lambda-35 UV-vis spectrophotometer using a quartz cuvette (path length = 1cm). Infrared (IR) spectra were recorded in potassium bromide (KBr) on Varian-3100 FT-IR spectrometer.  $^1\text{H}$  NMR spectra (chemical shifts in  $\delta$  ppm) were recorded on a JEOL AL 300 FT-NMR (300 MHz) spectrometer, using tetramethylsilane (TMS) as internal standard. Fluorescence spectra were recorded on Varian eclipse Carry spectrofluorometer using a quartz cuvette (path length = 1 cm) at 600 PMT voltage and slit width 5nm/5nm. All the spectroscopic experiments were carried out at room temperature. The stock solution of **2** ( $1 \times 10^{-3}$  M) were prepared in DMSO and diluted to obtain 5  $\mu\text{M}$  and 1  $\mu\text{M}$  solution in DMSO for the absorption and fluorescence measurements, respectively. The stock solutions of different anions ( $1 \times 10^{-1}$  M) were prepared by dissolving their tetrabutylammonium salt in MeCN. The anion interaction studies were performed by the addition of 140 equiv. of  $1 \times 10^{-1}$  M of different anions. The absorption and fluorescence titration experiment were performed by the gradual increase of concentration of  $\text{F}^-$  ( $c = 1 \times 10^{-2}$ ).

**Estimation of Quantum Yields.** The quantum yields of probe **2** and **2-F<sup>-</sup>** were estimated with respect to the quinine sulfate ( $\Phi = 0.54$ ) as standard in 0.1M  $\text{H}_2\text{SO}_4$  solution by secondary methods,<sup>12</sup> using equation (1).

$$Q = Q_R \cdot I/I_R \cdot OD_R/OD \cdot n^2/n_R^2 \quad (1)$$

Where  $Q$  is the quantum yield,  $I$  is the integrated intensity,  $OD$  is the optical density, and  $n$  is the refractive index. The subscript  $R$  refers to the reference fluorophore of known quantum yield.

**Estimation of Binding Constant.** The absorption and fluorescence experimental data were utilized to calculate association constants by Benesi-Hildebrand method<sup>24</sup> (B-H method) employing equations (2) for 1:1 stoichiometries.

$$1/(I - I_0) = 1/(I - I_f) + 1/K(I - I_f)[M] \quad (2)$$

Where  $K$  is the association constant,  $I$  is the absorbance/fluorescence intensity of the free probe **2**,  $I_o$  is the observed absorbance/fluorescence intensity of the **2-F**<sup>-</sup> complex, and  $I_f$  is the absorbance/fluorescence intensity at saturation level.

**Estimation of Limit of detection.** The limit of detection (LOD) of **2** for **F**<sup>-</sup> was estimated by equation (3).

$$\text{LOD} = 3\sigma / m \quad (3)$$

Where,  $\sigma$  stands for the standard deviation of blank solution of **2** and  $m$  stands for calibration sensitivity toward **F**<sup>-</sup> ions in DMSO solution of **2**.

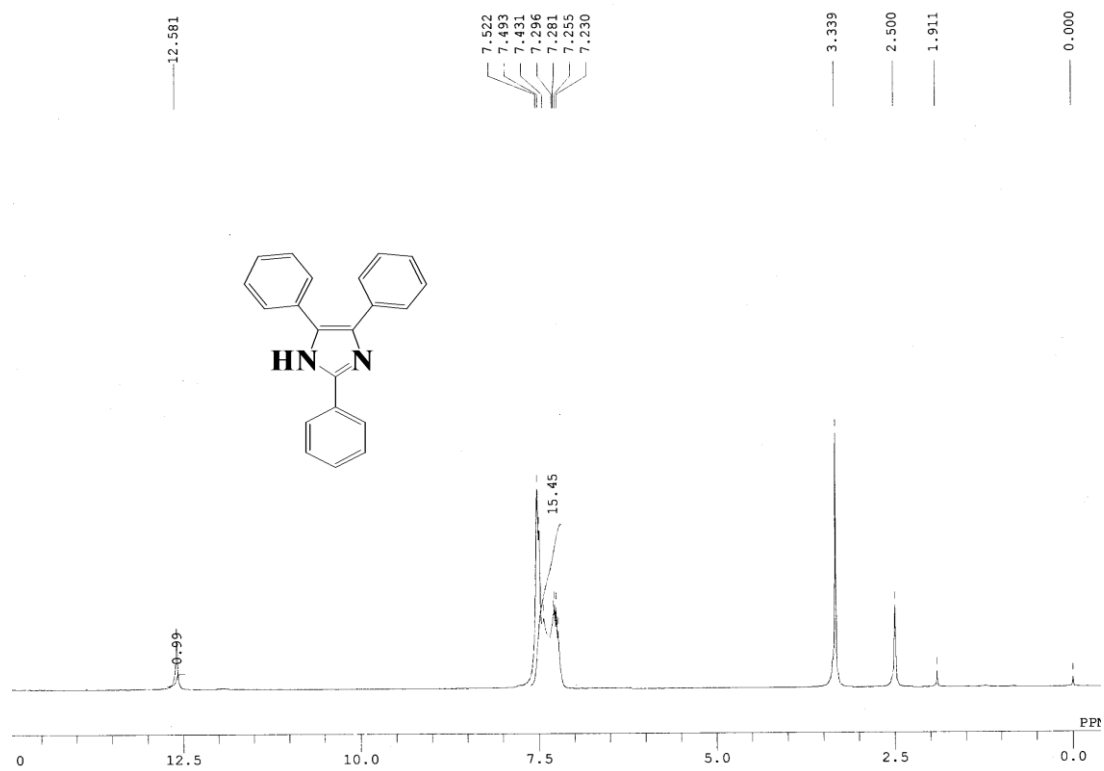

**Figure S1:**  $^1\text{H NMR}$  spectrum of **1a** in  $\text{DMSO-}d_6$ .

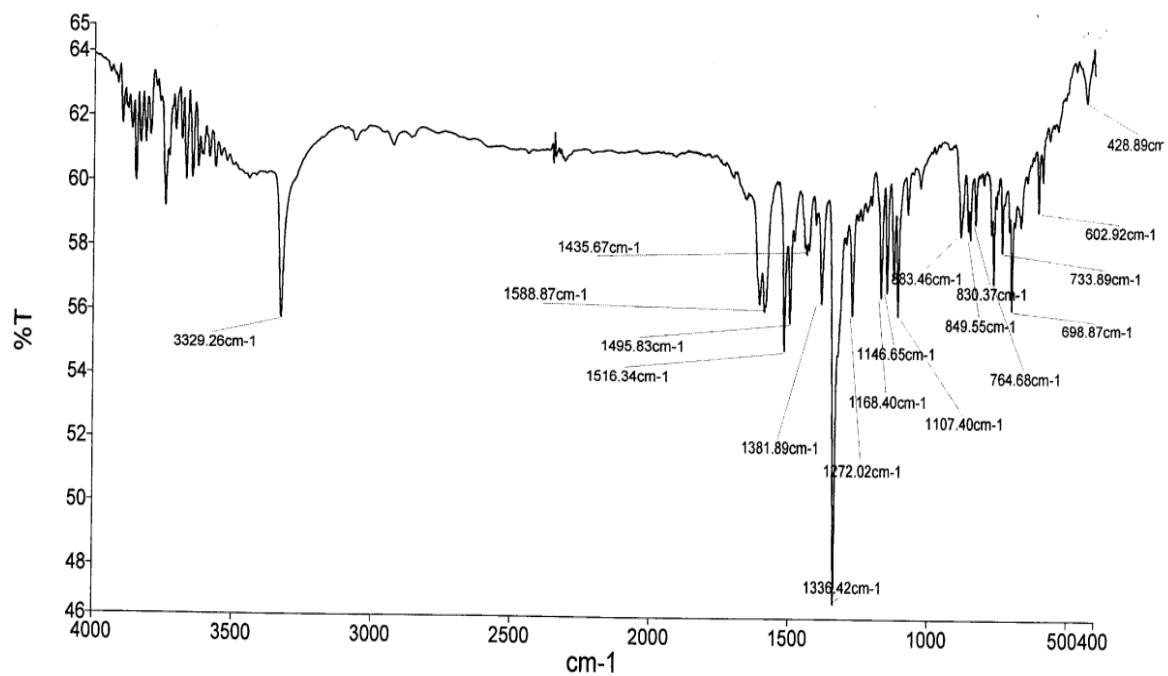

**Figure S2:** FT-IR spectrum of **1a**.

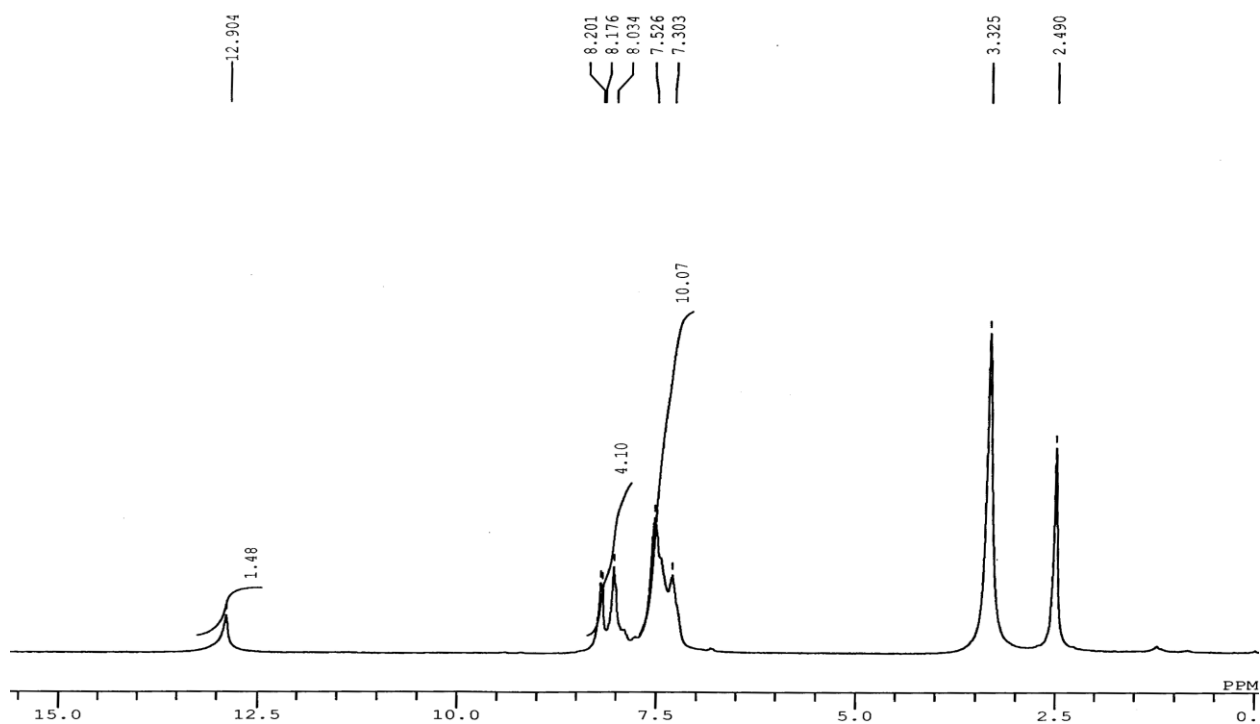

**Figure S3:**  $^1\text{H}$  NMR spectrum of **1b** in  $\text{DMSO}-d_6$ .

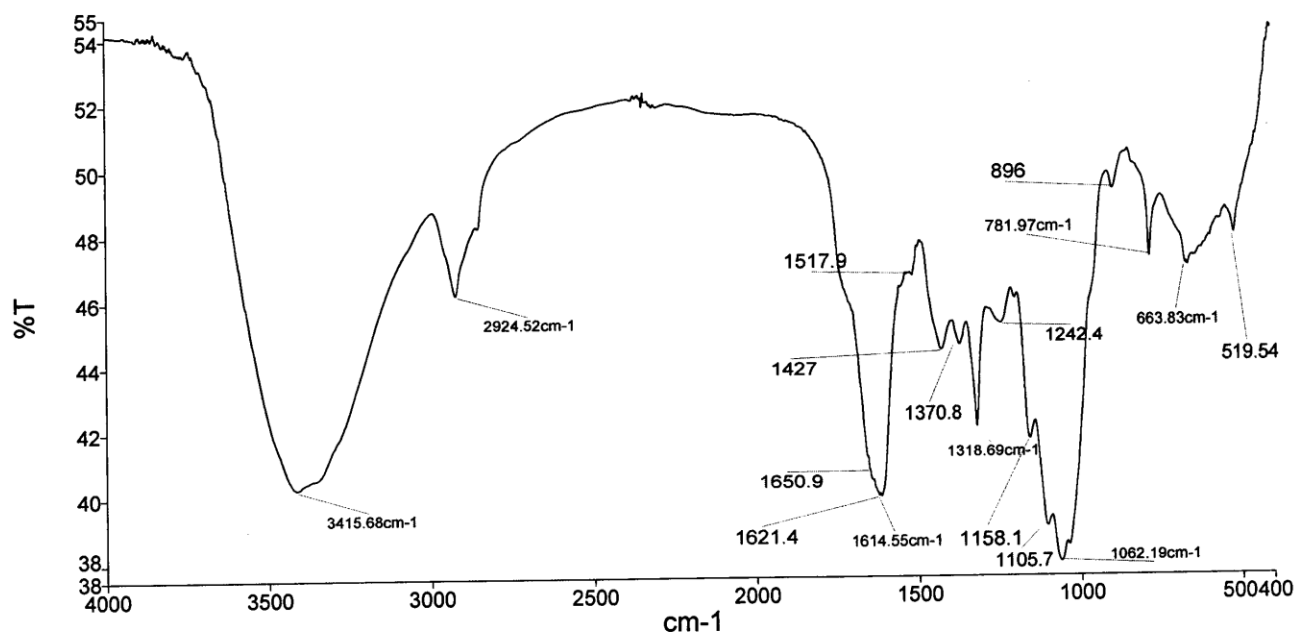

**Figure S4:** FT-IR spectrum of **1b**.

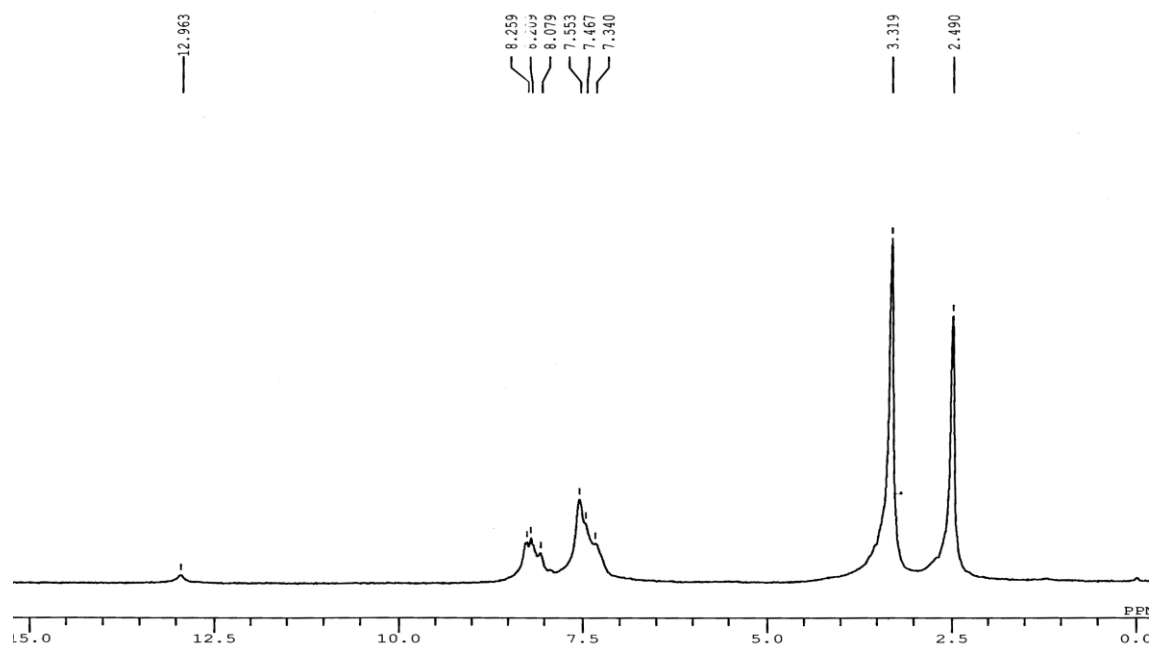

**Figure S5:**  $^1\text{H}$  NMR spectrum of **2** in  $\text{DMSO-}d_6$ .

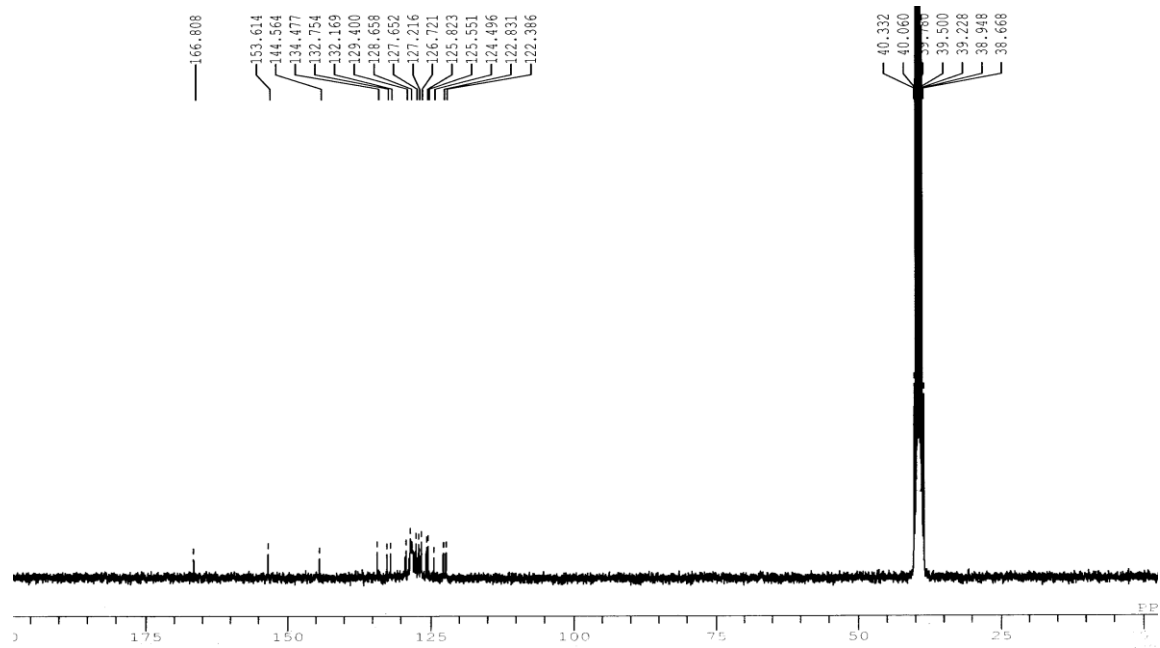

**Figure S6:**  $^{13}\text{C}$  NMR spectrum of **2** in  $\text{DMSO-}d_6$ .

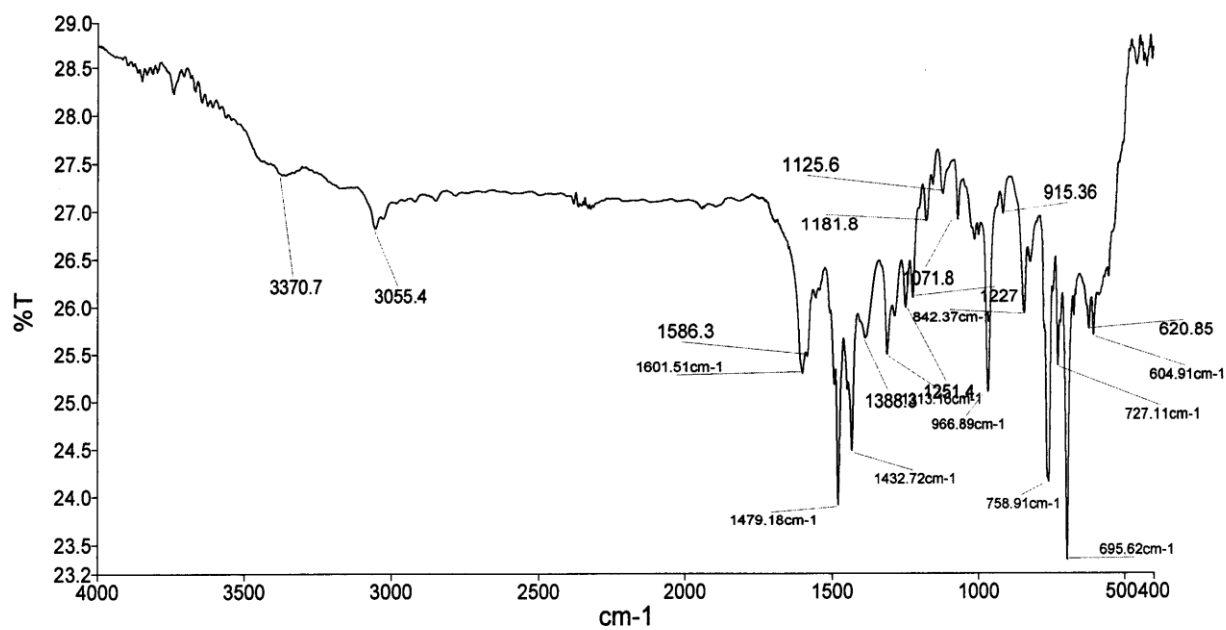

Figure S7: FT-IR spectrum of 2.

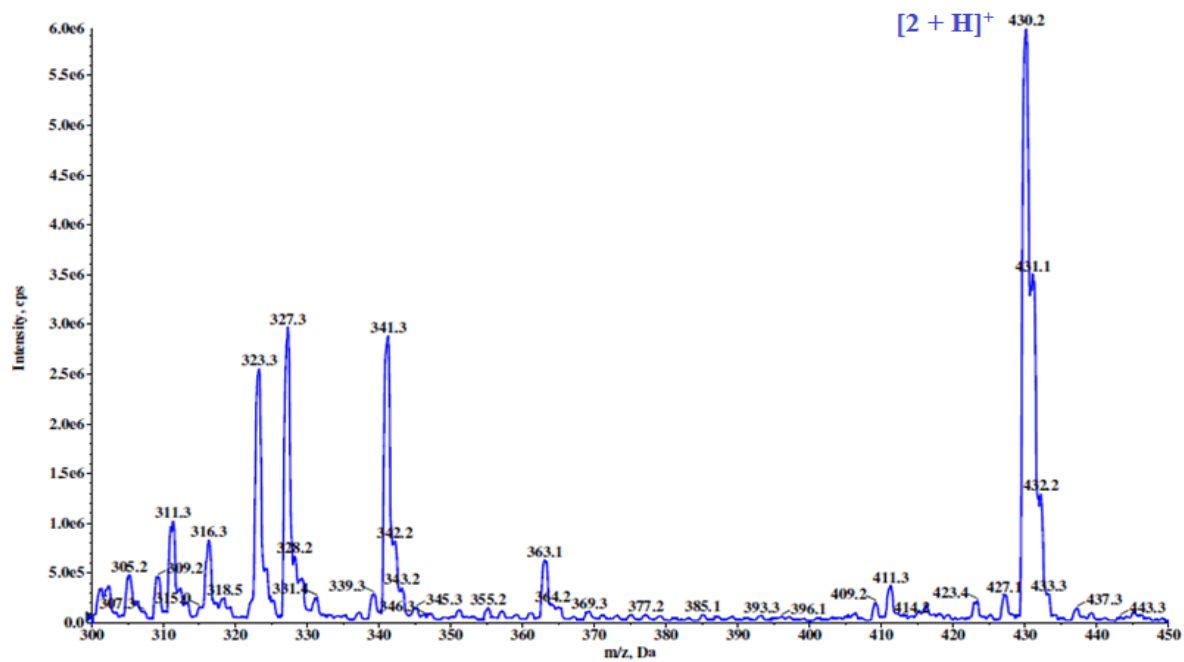

Figure S8: ESI-MS spectrum of 2.



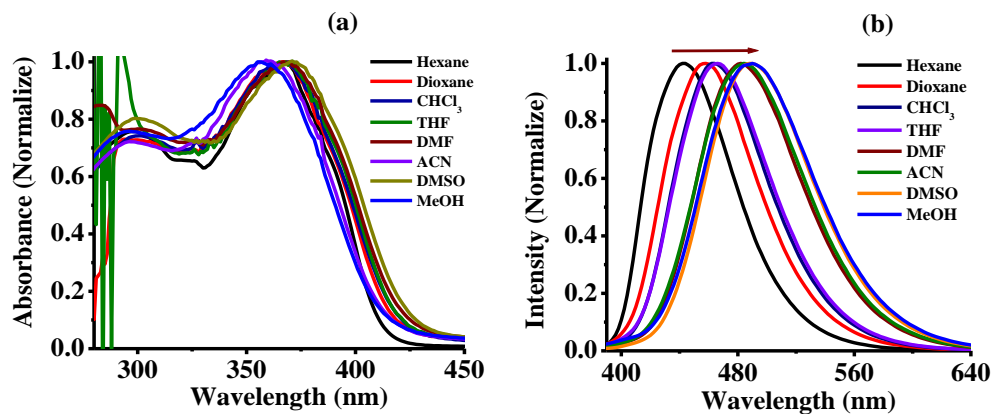

**Figure S9:** Normalized (a) Absorption and (b) Emission spectra of probe 2 in different solvents.

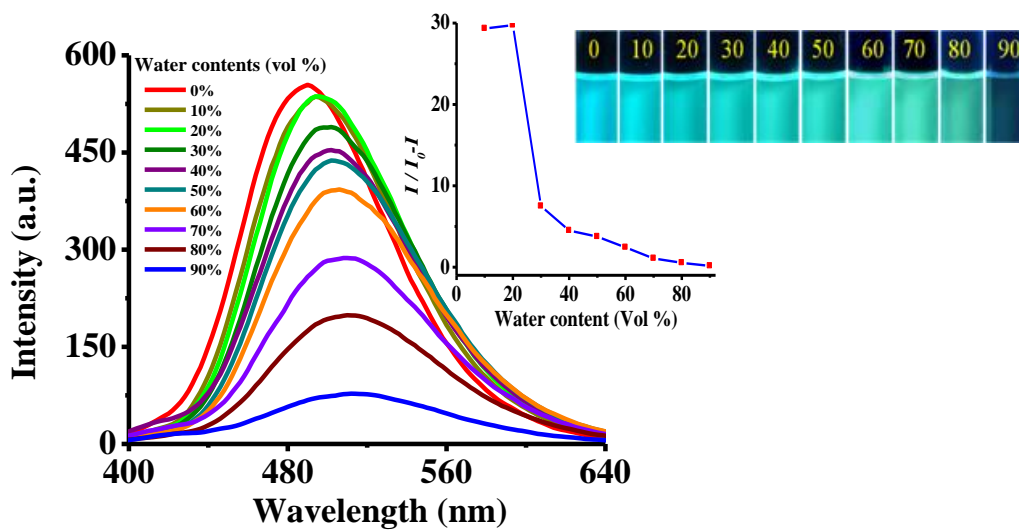

**Figure S10:** Fluorescence spectra of 2 in DMSO-Water mixtures with different water contents. Inset: the dependence of the fluorescence intensity on the composition of water and the corresponding fluorescence images of 2.

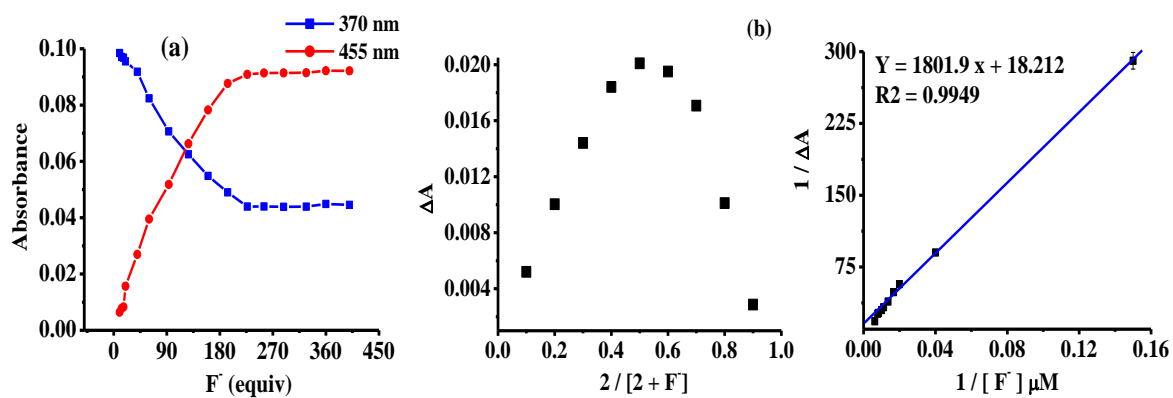

**Figure S11:** (a) Change in absorption as a function of  $F^-$  and (b) Job's plot and Benesi-Hildebrand plots based on absorption spectra.

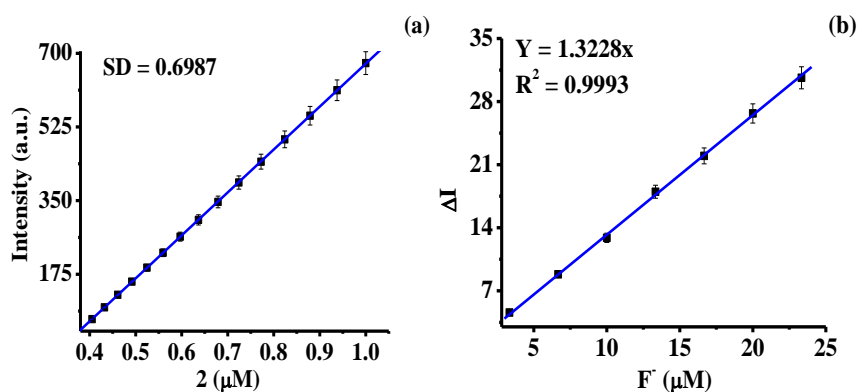

**Figure S12:** (a) Calibration curve for **2** (b) Calibration sensitivity curve (m) for **2** with  $F^-$ .  $\Delta I$  show the change in emission intensity of **2** upon addition of  $F^-$ .

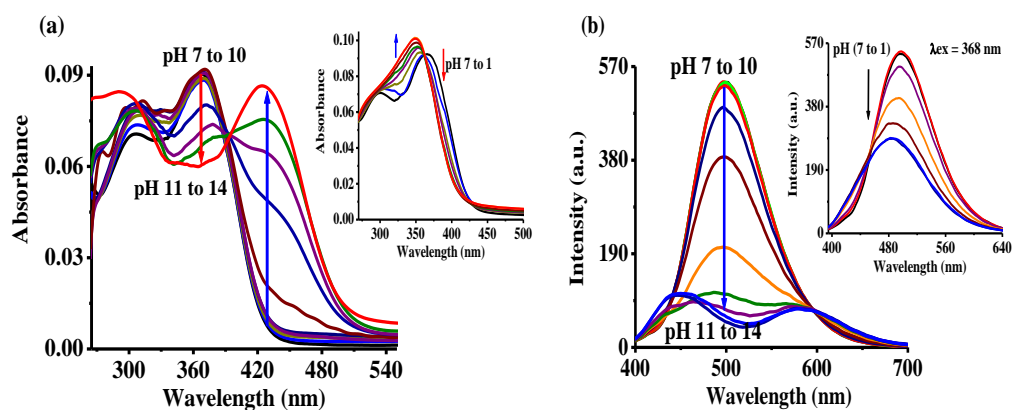

**Figure S13:** (a) Change in absorption ( $5\mu\text{M}$ ) and (b) emission ( $1\mu\text{M}$ ,  $\lambda_{\text{ex}}=368\text{ nm}$ ) spectra of **2** at different pHs in HEPES buffer.

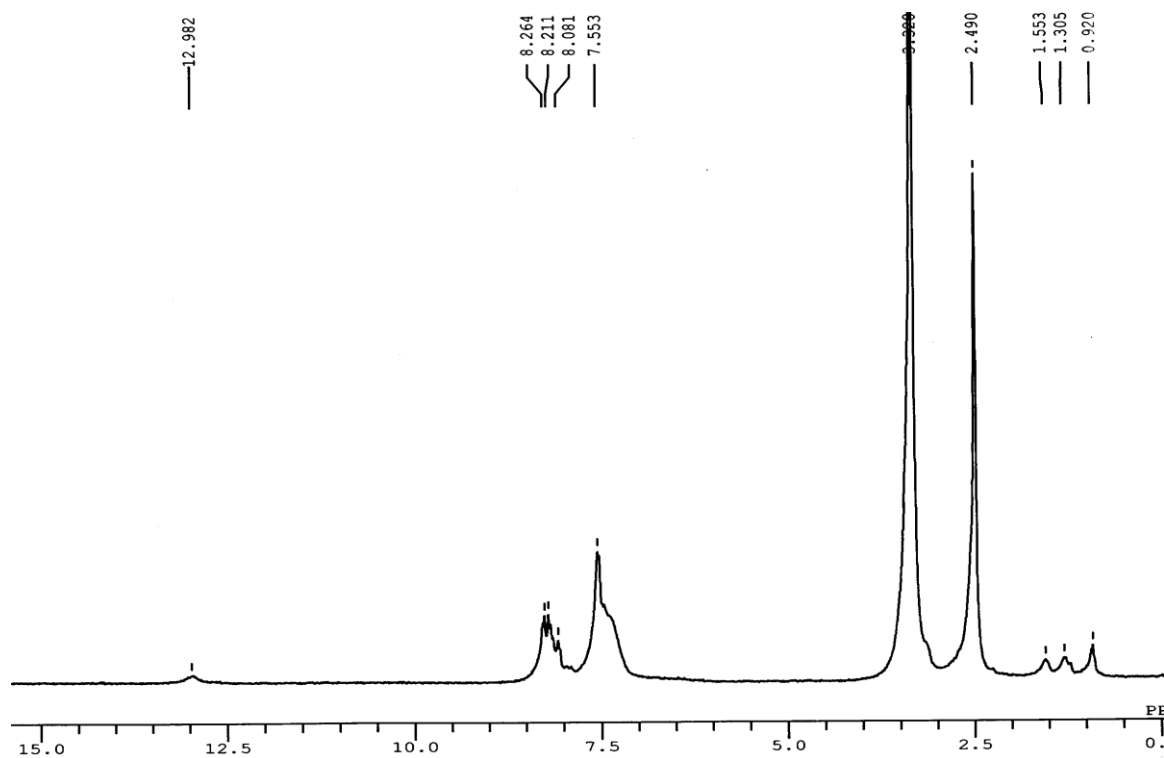

**Figure S14:**  $^1\text{H}$  NMR spectrum of **2** upon addition of 1.0 equiv of  $\text{F}^-$  in  $\text{DMSO-}d_6$ .

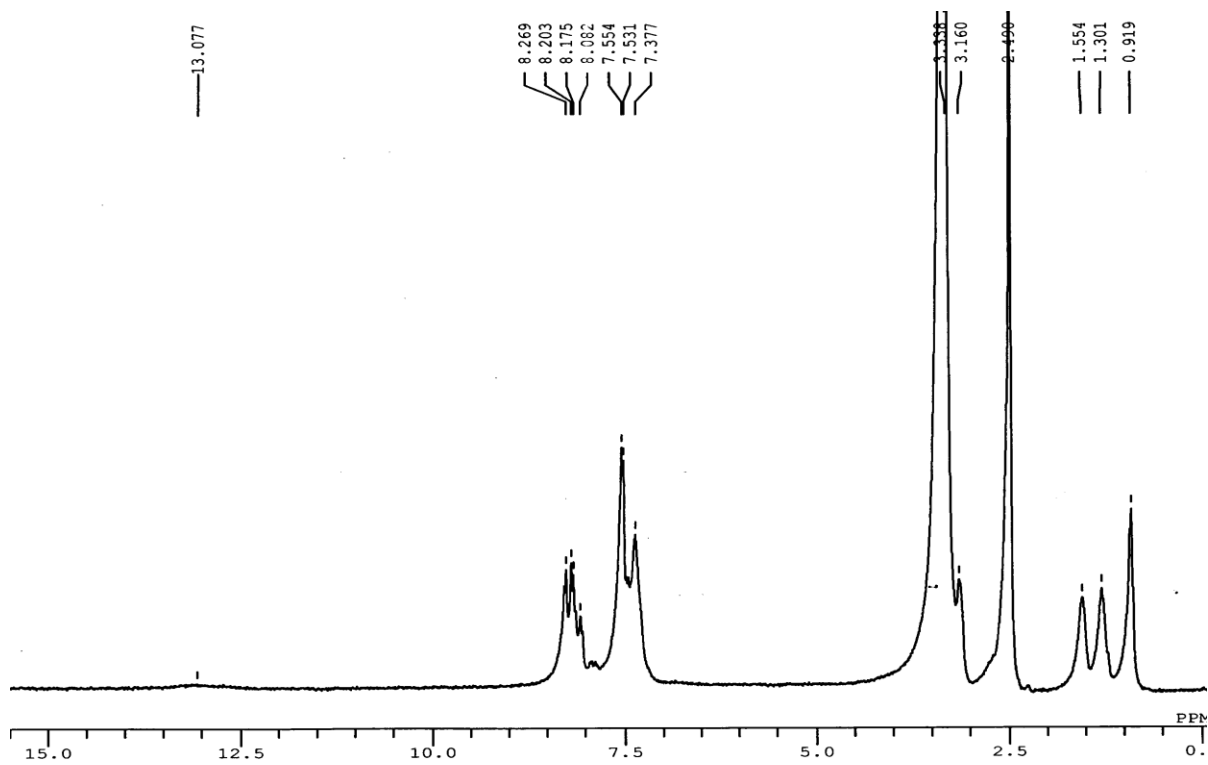

**Figure S15:**  $^1\text{H}$  NMR spectrum of **2** upon addition of 2.0 equiv of  $\text{F}^-$  in  $\text{DMSO-}d_6$ .

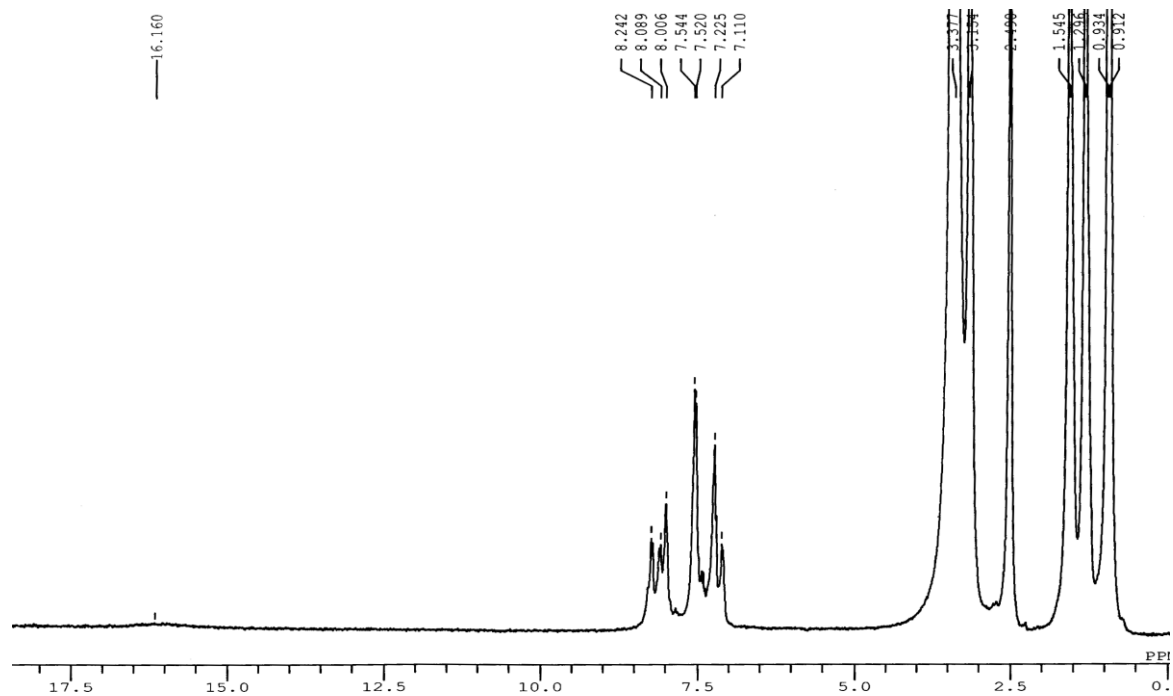

**Figure S16:**  $^1\text{H}$  NMR spectrum of **2** upon addition of 3.0 equiv of  $\text{F}^-$  in  $\text{DMSO-}d_6$ .

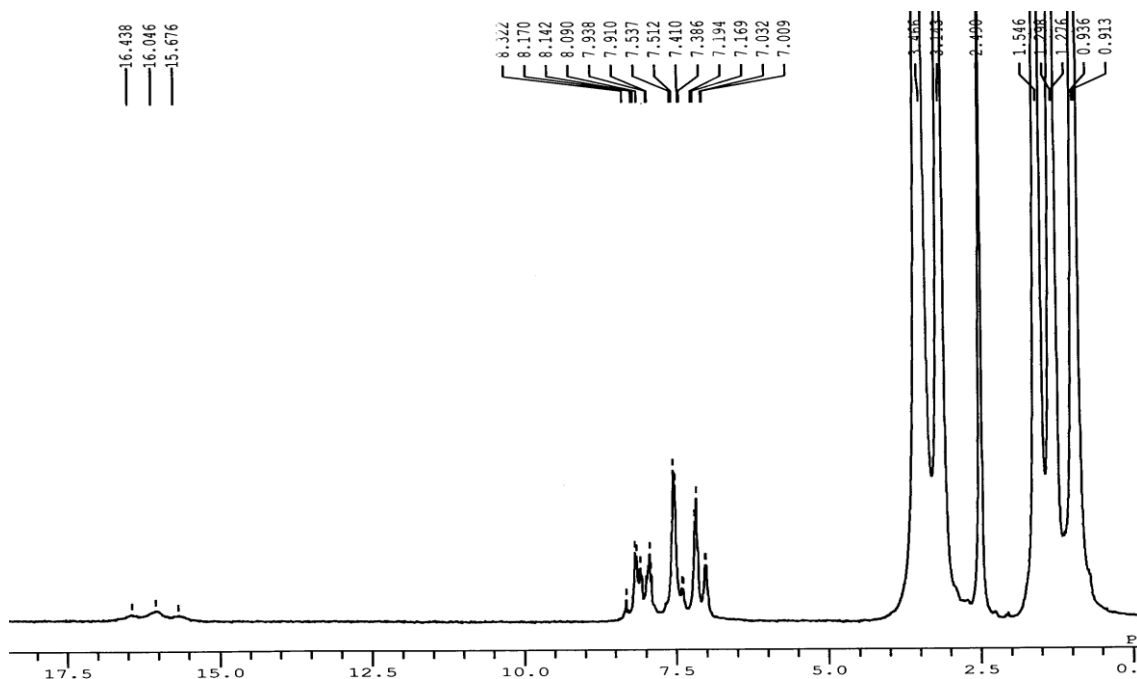

**Figure S17:**  $^1\text{H}$  NMR spectrum of **2** upon addition of 5.0 equiv of  $\text{F}^-$  in  $\text{DMSO-}d_6$ .

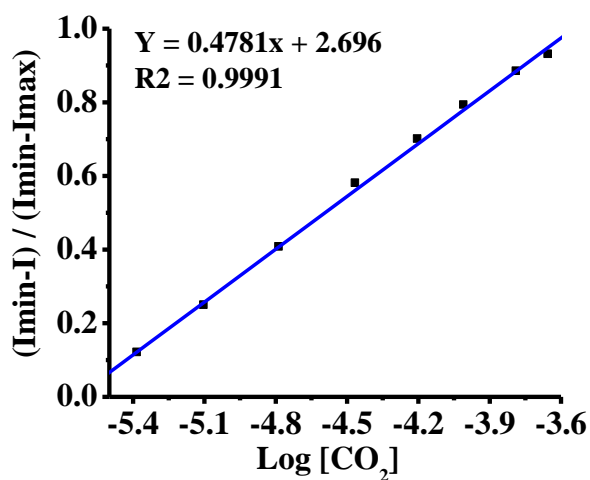

**Figure S18:** Fluorescence intensity change of **2**+ $\text{F}^-$  system (1  $\mu\text{M}$ ,  $\lambda_{\text{ex}} = 370$  nm) upon bubbling with different concentration of  $\text{CO}_2$  gas.

The detection limit of **2**+ $\text{F}^-$  system for  $\text{CO}_2$  was estimated from plot of normalized fluorescence change of **2**+ $\text{F}^-$  system with  $\text{CO}_2$  versus  $\text{Log} [\text{CO}_2]$  using equation (4)<sup>1,2</sup> and found to be  $2.29 \times 10^{-6}$  M.

$$10^{-[\text{Slope} / \text{Intercept}]} \quad (4)$$

- Shortreed, M.; Kopelman, R.; Kuhn, M.; Hoyland, B. *Anal. Chem.* **1996**, 68, 1414-1418.
- Kim, M. H.; Jang, H. H.; Yi, S.; Chang S.-K.; Han, M. S. *Chem. Commun.* **2009**, 4838-4840.

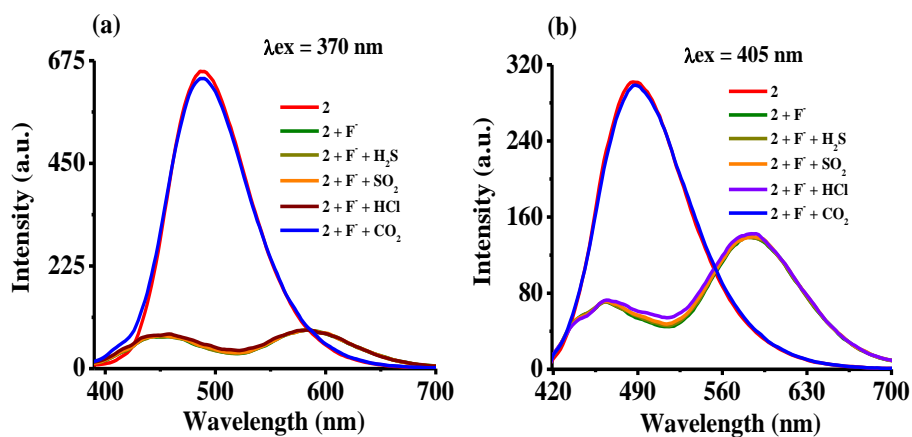

**Figure S19:** Change in emission spectra of **2** (1  $\mu\text{M}$ ) at (a)  $\lambda_{ex} = 370 \text{ nm}$  (b)  $\lambda_{ex} = 405 \text{ nm}$ , upon bubbling of 25 mL of different gases (H<sub>2</sub>S, SO<sub>2</sub>, HCl and CO<sub>2</sub>) to the solution of **2**+ F<sup>-</sup> in H<sub>2</sub>O-DMSO (20%).

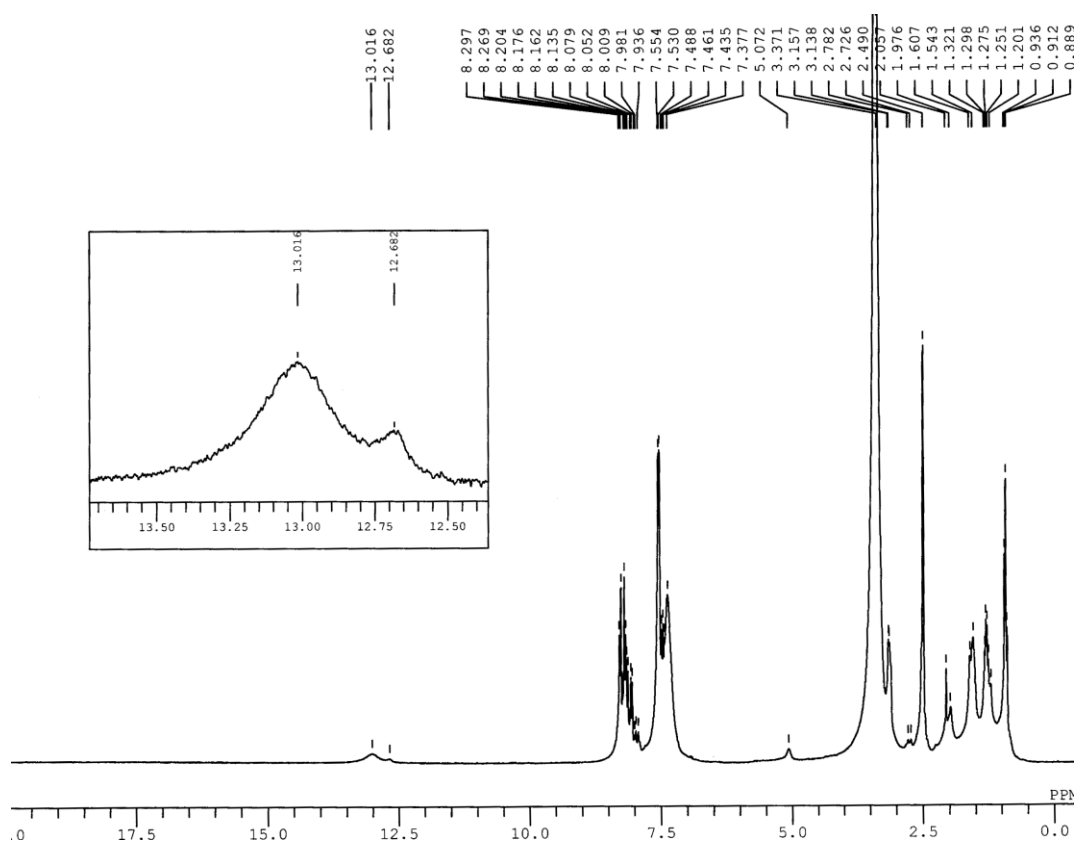

**Figure S20:** <sup>1</sup>H NMR spectrum of **3** in DMSO-*d*<sub>6</sub>.

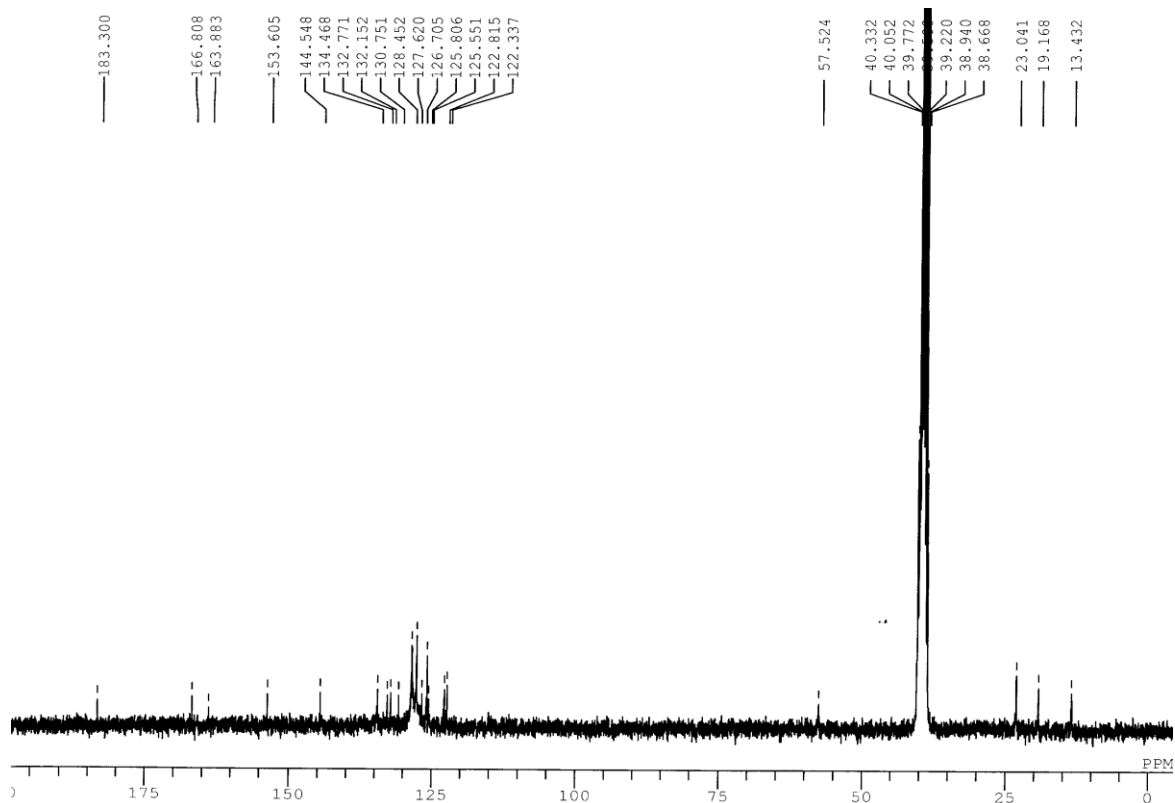

Figure S21:  $^{13}\text{C}$  NMR spectrum of **3** in  $\text{DMSO-}d_6$ .

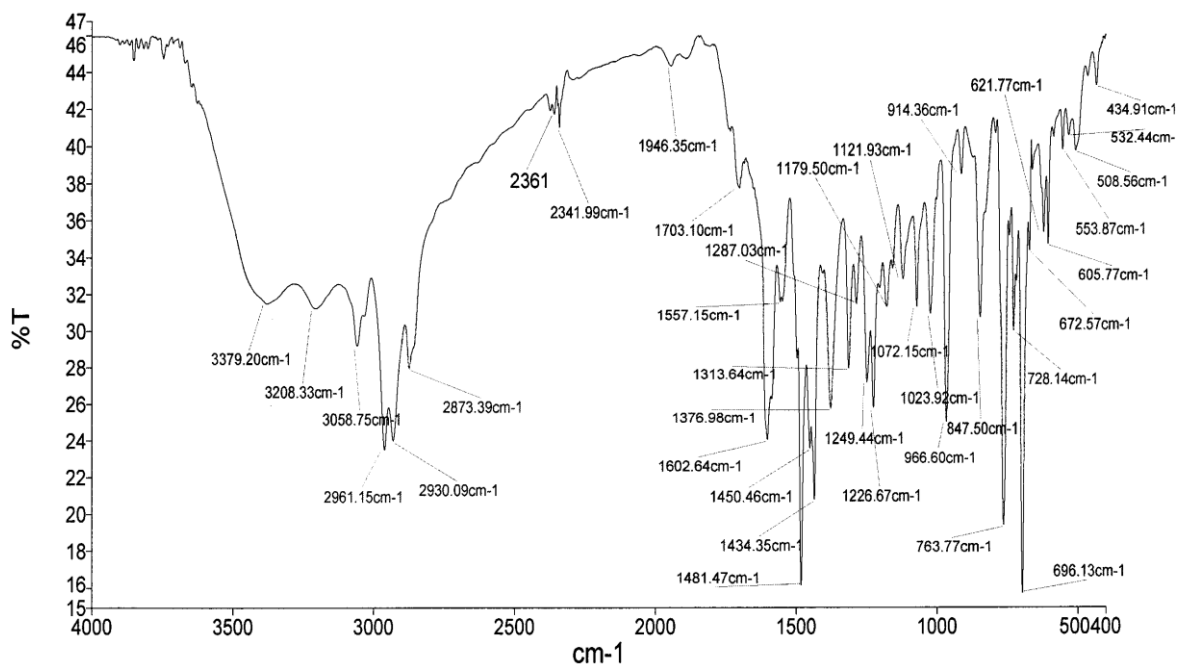

Figure S22: FT-IR spectrum of **3**.

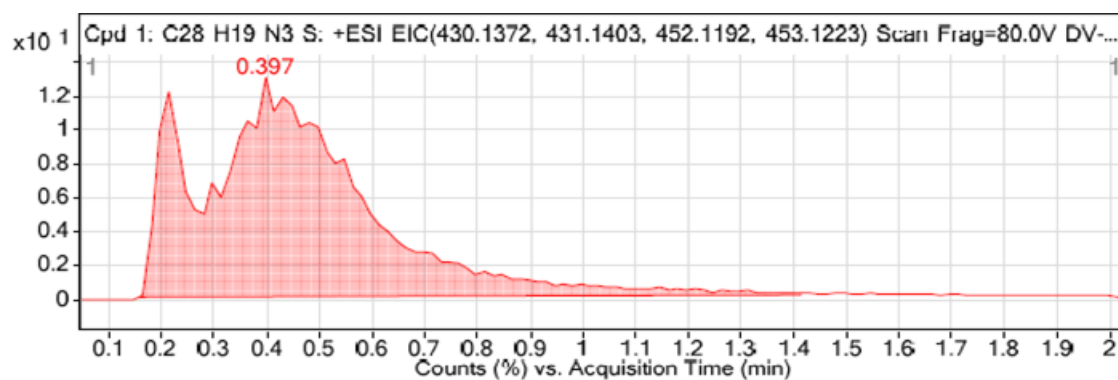

MS Spectrum

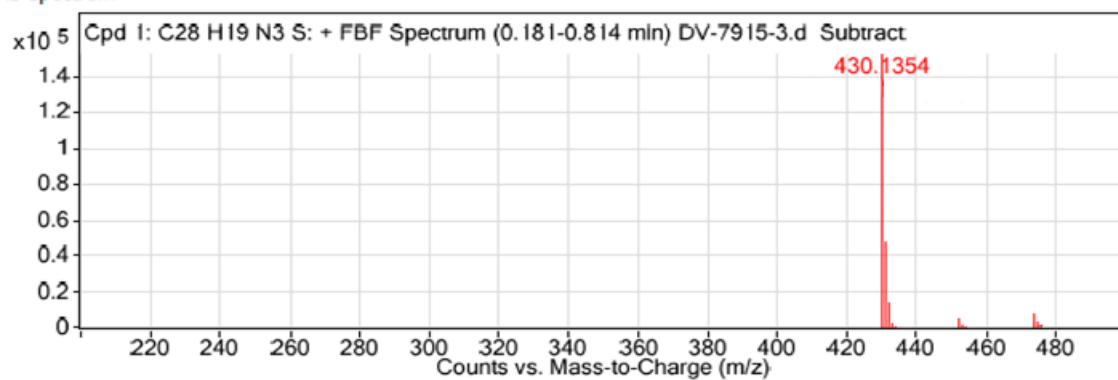

MS Zoomed Spectrum

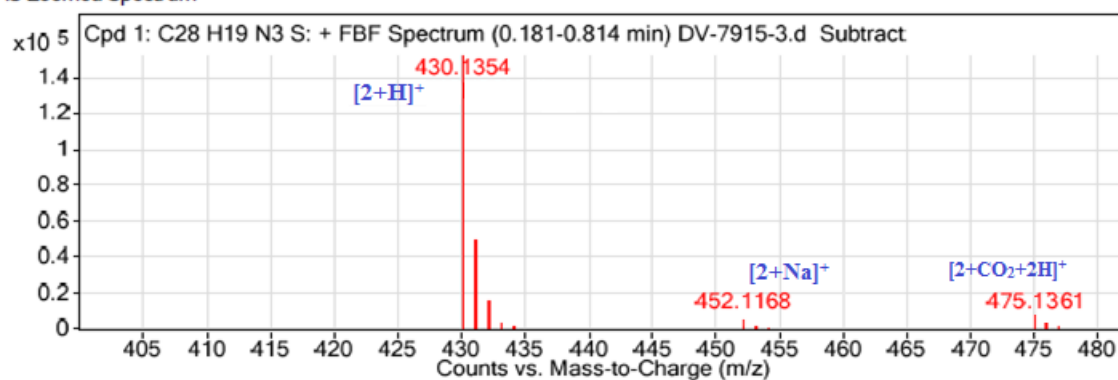

**Figure S23:** Mass spectrum of **3**.
